# Supplementary material
Source: Springer Nature journal article supplement (https://www.springerprofessional.de/resource/supplementary/13638_2011_303_MOESM13_ESM.pdf/11898162)

BER/BLER Performance: Candidate code vs WiMAX code

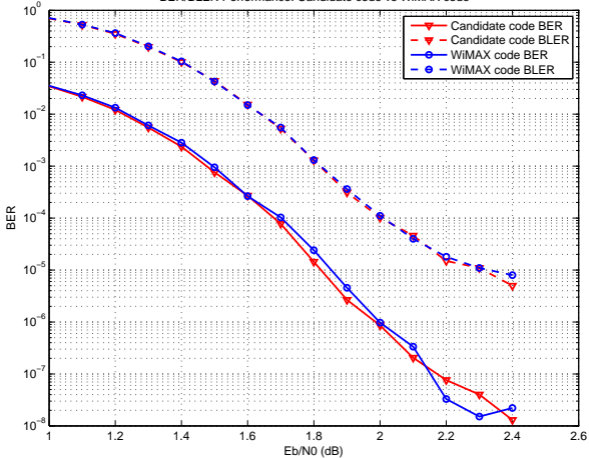

Supplement: MOESM13 [file 11898162]
